# Supplementary material for: Supershear crack propagation in snow slab avalanche release: new insights from numerical simulations and field measurements
Source: Copernicus journal article supplement (doi:10.5194/nhess-2024-70), 2024-04-19

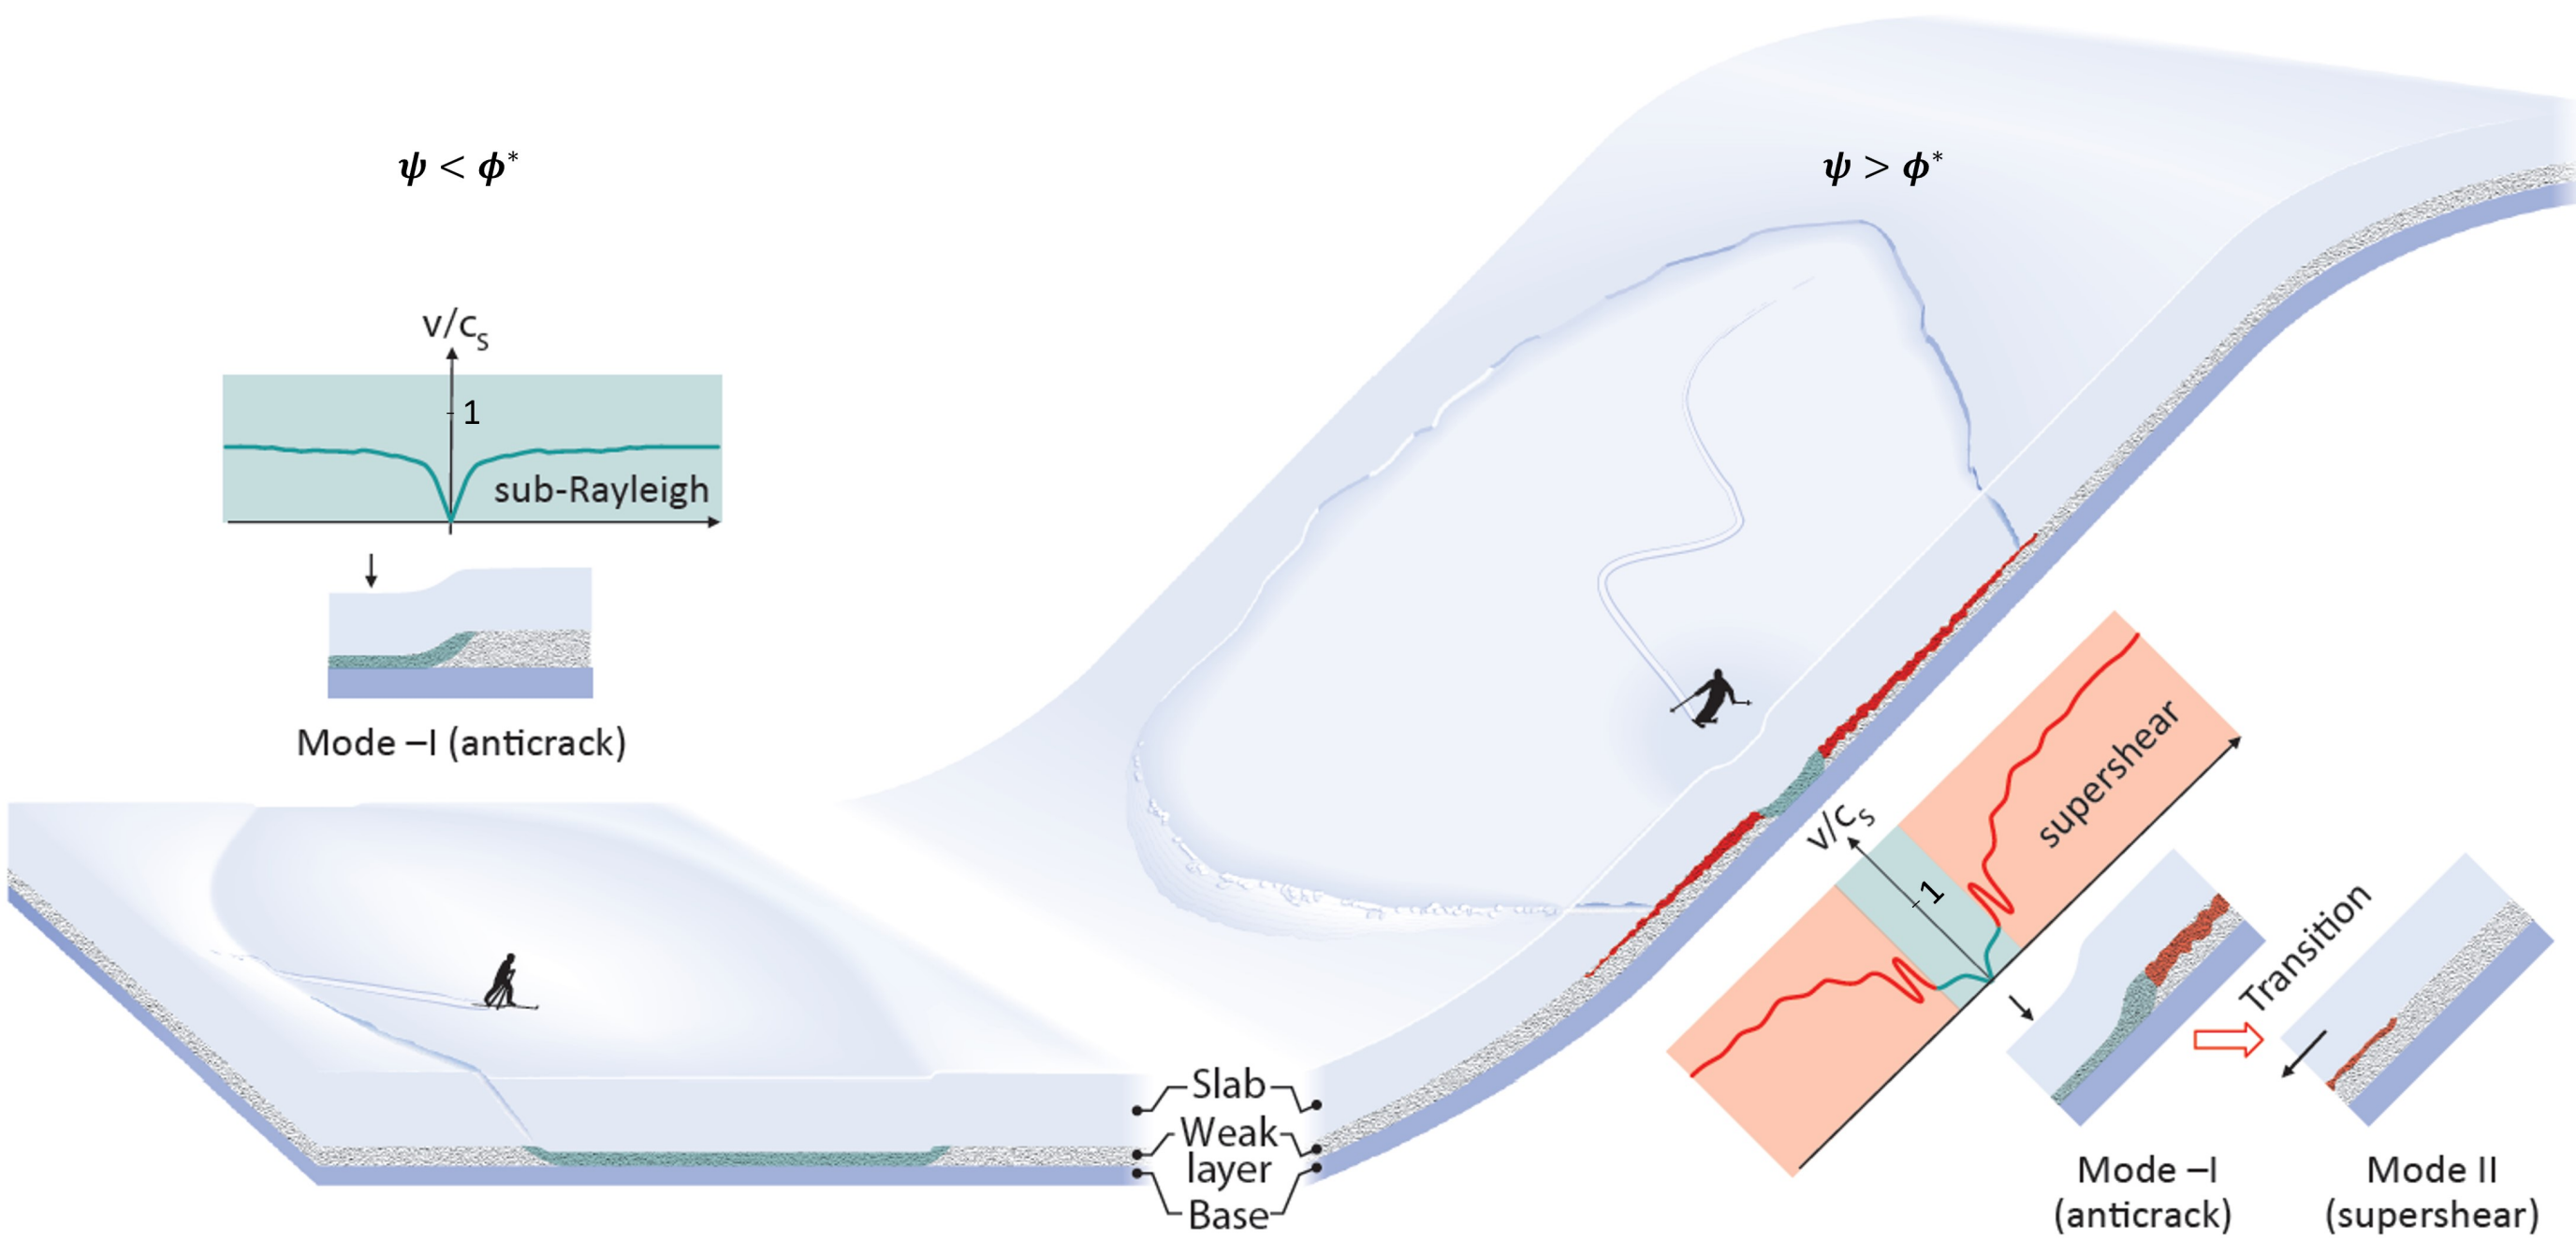

Supplement: Supplementary file [file nhess-2024-70-AC1-supplement.pdf]
